## Baroreflex activation therapy for resistant hypertension: results from mid-term prospective ambulatory blood pressure registry

M. Sindt, T. Madej, S. Grimm, M. Knaut

Heart Center - University Hospital Dresden, Dresden, Germany

**Funding Acknowledgement:** Type of funding source: None

**Objectives:** First generation baroreflex activation therapy (BAT) devices showed clinical efficacy in patients with drug-resistant arterial hypertension (AHT), but the safety profile was insufficient. Data regarding efficacy of second-generation devices were generated mostly from office blood pressure (BP) measurements or short-term 24-hour ambulatory blood pressure measurements (ABPM). We present a mid-term prospective registry to evaluate the efficacy and safety of recent BAT devices.

**Purpose:** The purpose of our study was to find a method that helps patients with drug-resistant arterial hypertension to control their blood pressure. Further we sought to reduce the overall amount of antihypertensive drugs to lessen side effects, as well as the effects of polypharmacy.

**Methods:** All patients receiving Barostim neo between November 2013 and June 2019 for resistant AHT were prospectively included into this observational study. ABPM was performed at baseline, in 3-month intervals in the first year after BAT implantation and in 6-month intervals afterwards for up to 42 months. Patients were assigned into two groups of responders and non-responders. Non-responders had a mean blood pressure drop (BPD) below 5mmHg. Responders in turn were categorized into 3 sub-groups (low-BPD between 5–9 mmHg, medium-BPD between 10–19 mmHg and high-BPD  $\geq 20$  mmHg). The primary efficacy end-points were changes in systolic and diastolic BP and number of antihypertensive medications. The primary safety end point was BAT-related major adverse events (MAE).

**Results:** 64 patients (mean age 63 years, 67% males) were included. Only patients who completed a 24-hour ABPM during a follow up were counted in the statistical analysis. We had an overall responder rate of 67.8%. Out of those 15.4% had low-BPD, 38.4% medium-BPD and 46.2% had a high-BPD. Systolic BP decreased over the 3.5-years period from  $168 \pm 17$  mmHg to  $149 \pm 19$  mmHg ( $n=19$ , mean change  $-18.8$  mmHg; 95% confidence interval [CI]:  $-29.32$  to  $-8.36$ ;  $p < 0.0007$ ). Diastolic BP decreased from  $97 \pm 16$  to  $85 \pm 12$  mmHg ( $n=19$ , mean change  $-11.7$  mmHg; 95% CI:  $-19.2$  to  $-4.2$ ;  $p < 0.0021$ ). The mean number of antihypertensive drugs was reduced from  $6.9 \pm 1.3$  to  $5.2 \pm 1.5$  ( $n=19$ , mean change  $-1.7$ ; 95% CI:  $-0.8$  to  $-0.27$ ;  $p < 0.0009$ ). The time course of primary end-points is shown in Fig.1. Freedom from BAT-related MAE was 93.5%. 4 perioperative complications (1 pocket bleeding, 1 pocket infection, 1 N. hypoglossus palsy, 1 hoarseness) resolved without residual side effects. There were five non BAT related deaths (7,8%) in the follow up period.

**Conclusion:** Systolic and diastolic ABP, as well as number and dosage of antihypertensive drugs decreased significantly during 3.5-years follow-up after Barostim neo implantation in 64 consecutive patients (of whom 62 completed at least one follow-up). No MAE associated with BAT were observed after the perioperative period. However, further controlled trials are needed to confirm the long-term efficacy of BAT.

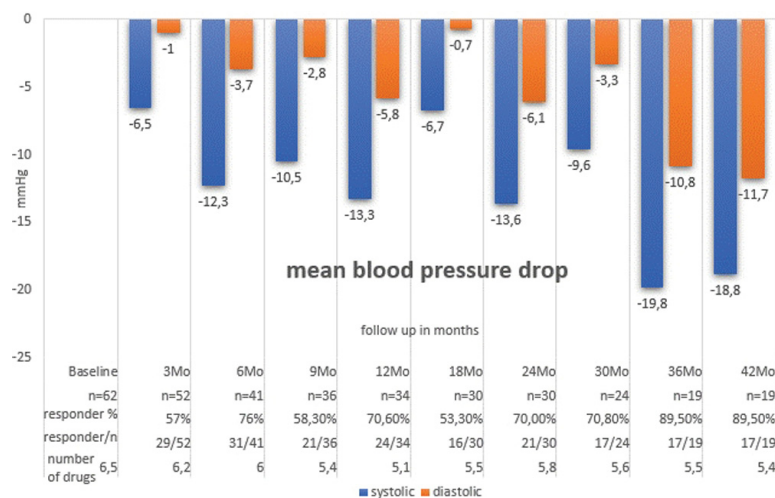

Figure 1. Mean blood pressure drop
